# Supplementary material for: Preparation and morphology-sensitive luminescence properties of Eu3+-doped YVO4: a defect chemistry viewpoint of study
Source: Royal Society of Chemistry journal article supplement (doi:10.1039/c2ce06568a), 2012-01-01
Supplement: c2ce06568a.pdf [file c2ce06568a.pdf]

## Supporting Information

### Preparation and morphology-sensitive luminescence properties of $\text{Eu}^{3+}$ -doped $\text{YVO}_4$ : A defect chemistry viewpoint of study

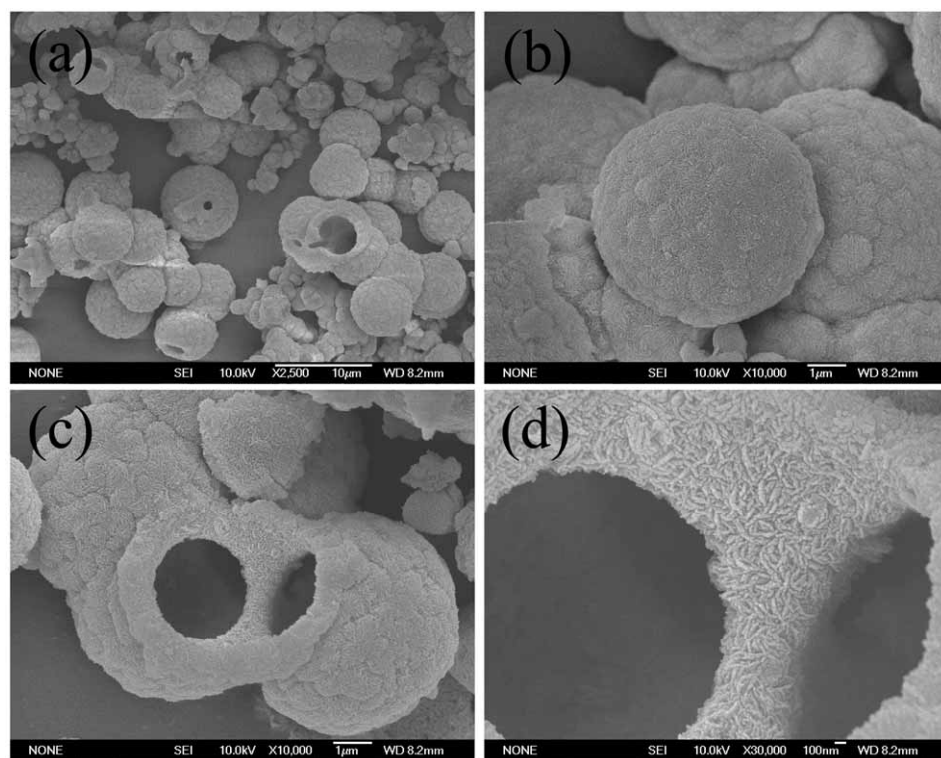

**Figure S1.** Low- and high- magnification SEM images of hollow microspheres prepared under pH=3.
